# Supplementary material for: Preparation of large micron-sized monodisperse polystyrene/silver core–shell microspheres with compact shell structure and their electrical conductive and catalytic properties
Source: Royal Society of Chemistry journal article supplement (doi:10.1039/c4ra12475h), 2014-12-01
Supplement: c4ra12475h1.pdf [file c4ra12475h1.pdf]

## Electronic Supplementary Information

### **Preparation of large micron-sized monodisperse core-shell polystyrene/silver microspheres with compact shell structure and their electrical conductive and catalytic properties**

Yougen Hu,<sup>a,b</sup> Tao Zhao,<sup>a</sup> Pengli Zhu,<sup>\*a</sup> Xianwen Liang,<sup>a</sup> Rong Sun,<sup>\*a</sup> Ching-ping Wong<sup>c,d</sup>

<sup>a</sup> Shenzhen Institutes of Advanced Technology, Chinese Academy of Sciences, Shenzhen, China.. E-mail: pl.zhu@siat.ac.cn

<sup>b</sup> University of Chinese Academy of Sciences, Beijing, China.

<sup>c</sup> School of Materials Sciences and Engineering, Georgia Institute of Technology, Atlanta, USA

<sup>d</sup> Department of Electronic Engineering, The Chinese University of Hong Kong, Hong Kong, China

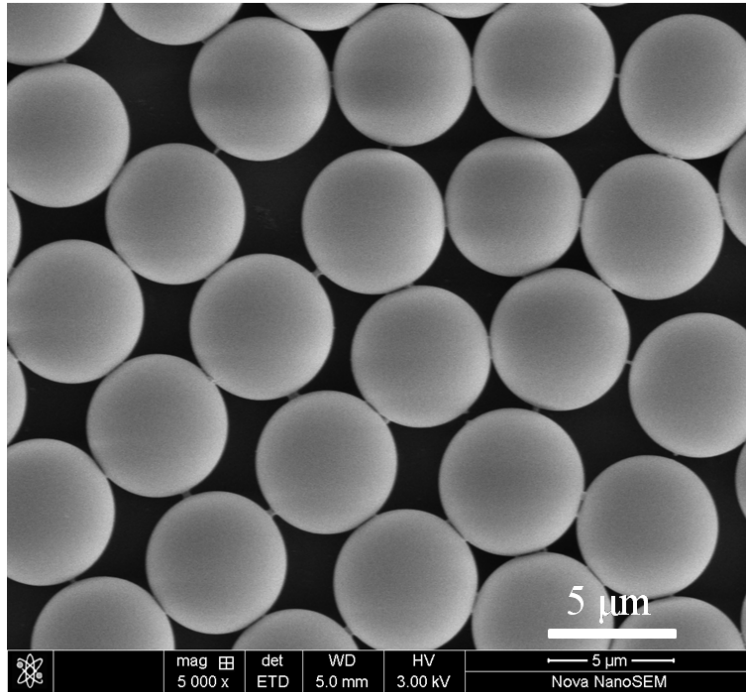

**Fig. S1.** SEM image of SPS microspheres.

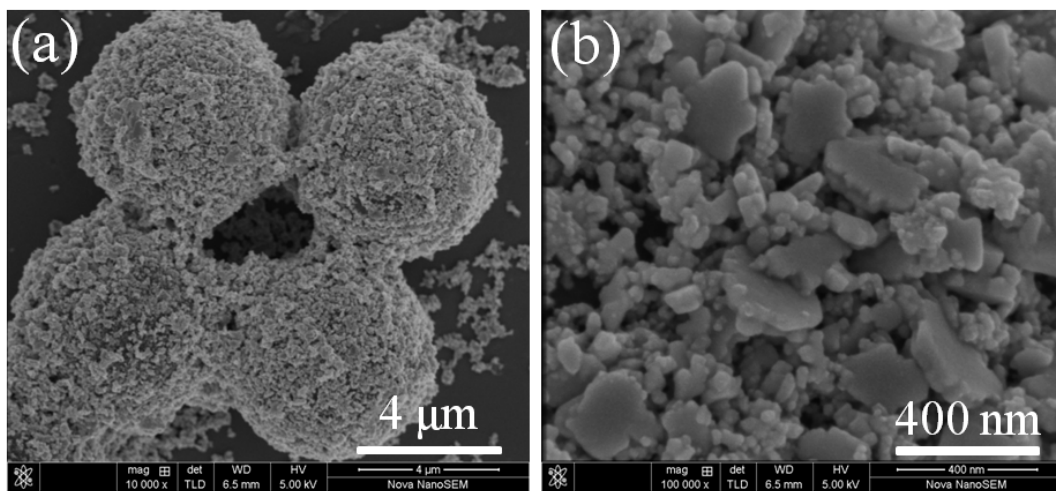

**Fig. S2** SEM images of micron-sized PS/Ag core-shell microspheres prepared without  $\text{Sn}^{2+}$  ions.

## Estimation of the Ag shell thickness in the PS/Ag core-shell microspheres from TGA data

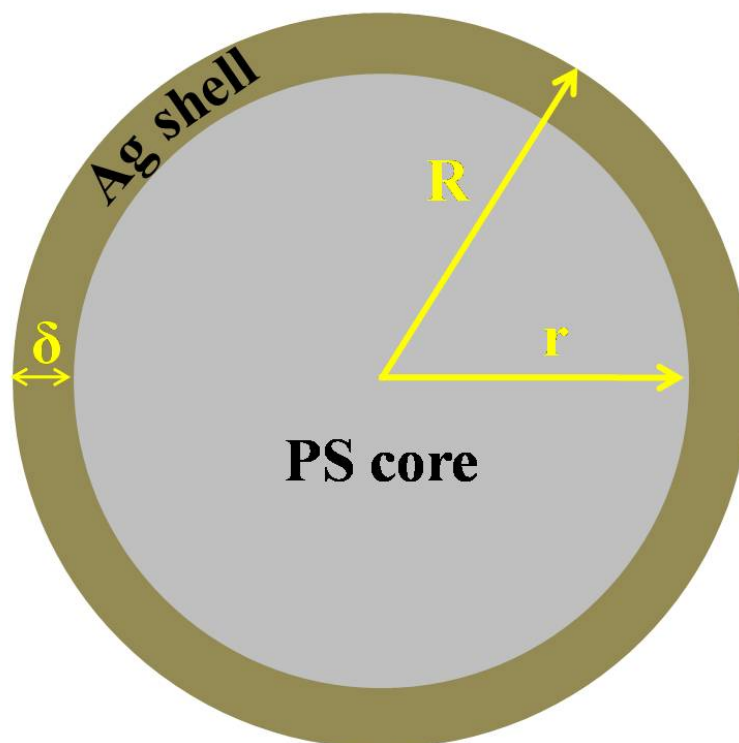

**Fig. S3.** A model cross-section of a PS microsphere with a continuous and compact silver layer on the surface

Calculations are performed for a single PS microsphere which has the radius of  $r$  and a continuous and compact silver layer with thickness of  $\delta$ . The theoretical amount of silver is calculated by dividing the mass of a single silver layer by the total mass of a core-shell PS/Ag microsphere.

The symbols represent as follows:

$r$  — radius of the PS microsphere;

$\delta$  — thickness of the silver layer;

$R$  — radius of the core-shell PS/Ag composite microsphere;

$m_{core}$  — mass of the PS microsphere;

$V_{core}$  — volume of the PS microsphere;

$\rho_{core}$  — density of the PS microsphere;

$m_{shell}$  — mass of the silver layer;

$V_{shell}$  — volume of the silver layer;

$\rho_{shell}$  — density of the silver layer;

$\omega$  — mass percentage of silver layer in the core-shell PS/Ag

composite microsphere.

First,  $\omega$  can be related to the mass of the composite microspheres as

$$\omega = \frac{m_{shell}}{m_{shell} + m_{core}} \quad i.e. \quad \frac{m_{shell}}{m_{core}} = \frac{\omega}{1 - \omega}$$

Then, the mass  $m_{shell}$  of a silver layer on a PS/Ag composite microsphere and the mass  $m_{core}$  of a PS core microsphere are calculated as follows:

$$m_{shell} = \rho_{shell} \cdot V_{shell} = \rho_{shell} \cdot \left( \frac{4}{3} \pi R^3 - \frac{4}{3} \pi r^3 \right) = \rho_{shell} \cdot \frac{4}{3} \pi \left[ (r + \delta)^3 - r^3 \right]$$

$$m_{core} = \rho_{core} \cdot V_{core} = \rho_{core} \cdot \frac{4}{3} \pi r^3$$

The mass ratio can be rewritten in terms of volumes as

$$\frac{m_{shell}}{m_{core}} = \frac{\rho_{shell} \cdot V_{shell}}{\rho_{core} \cdot V_{core}} = \frac{\rho_{shell}}{\rho_{core}} \cdot \frac{(r + \delta)^3 - r^3}{r^3} = \frac{\rho_{shell}}{\rho_{core}} \cdot \left[ \left( 1 + \frac{\delta}{r} \right)^3 - 1 \right]$$

to yield

$$\delta = r \left[ \left( \frac{\rho_{core}}{\rho_{shell}} \cdot \frac{\omega}{1-\omega} + 1 \right)^{1/3} - 1 \right]$$

The density of the PS microspheres and silver is known of about 1.05 g/cm<sup>3</sup> and 10.53 g/cm<sup>3</sup>, respectively. The radius  $r$  of a PS microsphere is also known of 2.8  $\mu\text{m}$  (an average diameter of 5.6  $\mu\text{m}$ ) from the SEM images shown in Figure 2a and b. For the sample of PS/Ag-30 core-shell hybrid microspheres, the mass percentage of silver layer is 55.03% given by TGA data in Figure 9. Finally, the silver shell thickness of PS/Ag-30 microsphere is calculated by the above formula.

$$\delta = 2.8\mu\text{m} \left[ \left( \frac{1.05\text{g/cm}^3}{10.53\text{g/cm}^3} \cdot \frac{55.03\%}{1-55.03\%} + 1 \right)^{1/3} - 1 \right] = 109.4\text{nm}$$

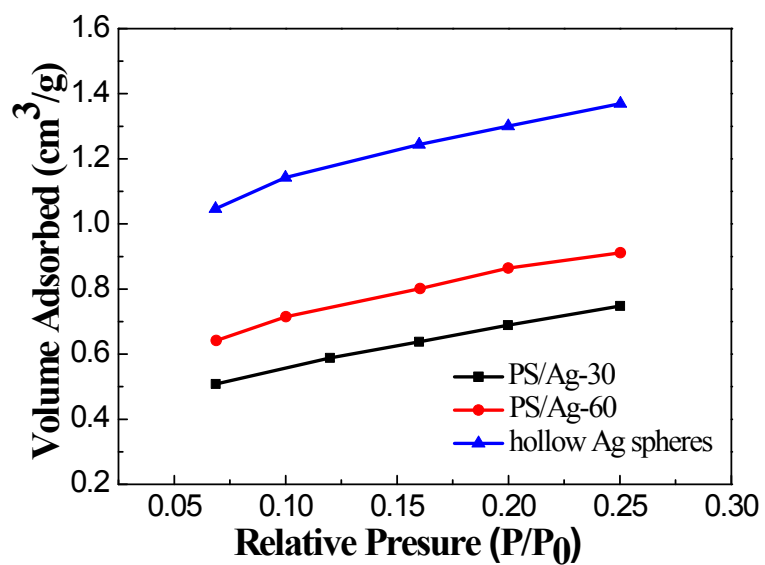

**Fig. S4.** The nitrogen adsorption isotherms measured at 77 K of PS/Ag-30, PS/Ag-60 core-shell microspheres and hollow Ag spheres
